# Supplementary material for: Chemotherapy-induced intestinal damage, body mass index, plasma amino acids, and fecal calprotectin in children treated for acute lymphoblastic leukemia: A prospective cohort study
Source: Research Square preprint supplement (doi:10.21203/rs.3.rs-5693659/v1), 2024-12-30
Supplement: Supplementary file 1 [file e24aa2cc2d89c98217eac90b.docx]

**Supplementary Information:**

Supplementary Table 1. Severity of intestinal damage according to Common Terminology Criteria for Adverse Events (CTCAE) v5.0.

| **CTCAE Term** | **Grade 1** | **Grade 2** | **Grade 3** | **Grade 4** | **Grade 5** |
| --- | --- | --- | --- | --- | --- |
| Gastrointestinal pain | Mild pain | Moderate pain; limiting  instrumental ADL* | Severe pain; limiting self-care  ADL** | − | − |
| Diarrhea | <4 stools per day  over baseline; slight increase in  ostomy output compared with  baseline | 4–6 stools per day  over baseline; moderate  increase in ostomy output  compared with baseline; limiting  instrumental ADL | ≥7 stools per day  over baseline; hospitalization  indicated; severe increase in  ostomy output compared with  baseline; limiting self-care ADL | Life-threatening  consequences; urgent  interventions indicated | Death |
| Enterocilitis | Asymptomatic; clinical or  diagnostic observations only;  no interventions indicated | Abdominal pain; mucus or  blood in stools | Severe or persistent  abdominal pain; fever; ileus;  peritoneal signs | Life-threatening  consequences; urgent  interventions indicated | Death |

ADL, activities of daily living

*Instrumental ADL refers to preparing meals, shopping for groceries or clothes, using telephone, managing money, etc.

**Self-care ADL refers to bathing, dressing and undressing, feeding self, using toilet, taking medications, and being not bedridden.

Supplementary Table 2. Citrulline, glutamine, albumin, and fCLP concentrations at each time point in patients with and without intestinal damage.

|  | **ID (+)** | **ID (−)** | **ID (+)** | **ID (−)** | **ID (+)** | **ID (−)** | **ID (+)** | **ID (−)** | **ID (+)** | **ID (−)** |
| --- | --- | --- | --- | --- | --- | --- | --- | --- | --- | --- |
| **Biomarker, mcol/L median, IQR** | **Day 1** | | **Day 8** | | **Day 15** | | **Day 22** | | **Day 29** | |
| Citrulline | **22.3**  (22.3–22.3) | **20.8**  (14.7–26.6) | **14.4**  (7.7–14.6) | **17.5**  (13.8–21.4) | **18.3**  (11.4–23.3) | **19.9**  (13.5–23.6) | **8.8**  (8.6–19.6) | **24.25**  (19.1–29.3) | **10.1**  (9.2–13.1) | **26.5**  (18.9–36.1) |
| Glutamine | **633.0**  (633–633) | **541.5**  (473.5–641.2) | **488.0**  (358–493) | **472.0**  (398–529) | **405.5**  (318.8–432.2) | **424.0**  (346.2–510.5) | **392.0**  (244–466.5) | **399.5**  (325.2–522.2) | **415.0**  (250–503) | **428.5**  (332.5–578.8) |
| Albumin | **44.4**  (44.4–44.4) | **40.0**  (35.9–44.3) | **35.8**  (35.8–38) | **38.0**  (34.6–40.4) | **33.2**  (31.8–36.7) | **34.9**  (32.2–37.4) | **27.8**  (25.7–29.4) | **32.0**  (29.9–33) | **30.2**  (25.9–31.9) | **30.4**  (27.8–33.6) |
| Fecal calprotectin | NA | **12.0**  (6.6–27) | **15.0**  (5.4–35) | **31.0**  (9.7–58.5) | **31.0**  (27.2–37.8) | **32.5**  (14.2–89) | **53.0**  (46.5–120.5) | **33.0**  (19.2–69.5) | **77.0**  (43.5–215.2) | **48.0**  (12.5–74) |

ID, intestinal damage; IQR, interquartile range

Supplementary Table 3. Comparison of plasma AA, fecal CLP, CRP, and ANC levels in patients with intestinal damage between the malnourished and normally nourished groups.

| **Biomarker, mcmol/L** | **Malnourished, median (IQR)/mean (SD)*** | **Normally nourished, median (IQR)/mean (SD) *** | **p-value** |
| --- | --- | --- | --- |
| Phosphoserine | 1.90 (1.5–2.7) | 2.26 (1.5–3.1) | 0.795 |
| Taurine | 37.50 (30.4–46.4) | 42.60 (31.1–52.7) | 0.415 |
| **Phosphoetanolamine** | **0.49 (0.1**–**1.6)** | **0.00 (0.0–0.0)** | **0.002** |
| Aspartate acid | 0.00 (0.0–10.7) | 11.31 (0.0–13.6) | 0.220 |
| Threonine* | 243.33 (125.13) | 221.95 (79.91) | 0.570 |
| Serine* | 150.87 (64.07) | 140.89 (39.58) | 0.602 |
| Asparagine | 0.00 (0.0–0.0) | 0.00 (0.0–0.0) | 0.910 |
| Glutamic acid* | 211.90 (108.7) | 195.28 (101.46) | 0.652 |
| Glutamine* | 491.53 (152.94) | 387.63 (150.33) | 0.057 |
| Sarcosine | 0.00 (0.0–7.6) | 4.52 (0.0–7.1) | 0.711 |
| Α-aminoadipic acid | 2.69 (2.1–3.7) | 3.04 (2.2–4.5) | 0.627 |
| Glycine | 239.00 (212.0–280.5) | 251.00 (217.5–305.5) | 0.323 |
| Alanine* | 451.93 (237.79) | 442.05 (195.26) | 0.898 |
| Citrulline | 18.40 (14.0–29.7) | 14.40 (8.8–19.2) | 0.061 |
| Α-aminobutyric acid | 36.70 (20.9–48.0) | 24.40 (18.5–46) | 0.499 |
| Valine* | 369.60 (166.77) | 338.89 (148.82) | 0.581 |
| Cystine* | 19.35 (10.56) | 13.85 (10.47) | 0.141 |
| Methionine* | 30.29 (12.24) | 31.63 (14.85) | 0.775 |
| Cysthathione | 0.00 (0.0–2.3) | 1.96 (0.0–3.5) | 0.310 |
| Isoleucine | 107.60 (69.2–146.1) | 96.80 (69.9–138.6) | 0.784 |
| Leucine | 210.00 (133.6–274.6) | 166.60 (142.4–237.6) | 0.437 |
| Tyrosine | 85.10 (55.8–101.7) | 70.00 (50.3–95.2) | 0.945 |
| Β - alanine | 5.24 (1.4–7.2) | 4.31 (2.1–6.8) | 0.499 |
| Phenylalanine | 121.10 (100.6–193.3) | 116.80 (94.8–149.8) | 0.945 |
| Β-aminoisobutyric acid | 0.00 (0.0–1.8) | 0.00 (0.0–0.0) | 0.706 |
| Homocysteine | 0.00 (0.0–0.0) | 0.00 (0.0–0.0) | NA |
| Ethanolamine | 0.00 (0.0–4.7) | 0.00 (0.0–0.0) | 0.431 |
| Ammonia | 159.90 (108.8–187.6) | 109.60 (97.1–135.2) | 0.148 |
| Hydroxylysine | 1.03 (0.2–2.4) | 1.13 (0.4–1.8) | 0.167 |
| Ornithine | 57.60 (38.0–71.8) | 47.50 (39.5–67.7) | 0.916 |
| Lysine* | 167.08 (64.86) | 184.50 (60.37) | 0.429 |
| 1-methyl-histidine | 9.80 (6.0–17.7) | 8.00 (6.2–10.5) | 0.367 |
| Histidine* | 72.94 (24.27) | 78.91 (19.91) | 0.448 |
| Tryptophan* | 38.76 (18.81) | 43.37 (18.69) | 0.482 |
| 3-methyl-histidine | 0.00 (0.0–1.4) | 0.00 (0.0–0.0) | 0.377 |
| Arginine | 55.30 (39.7–79.2) | 60.70 (42.1–74.5) | 0.784 |
| Hydroxyproline | 9.50 (8.9–26) | 10.00 (5.6 - 14.6) | 0.376 |
| Proline* | 244.87 (103.67) | 255.37 (140.56) | 0.804 |
| Urea* | 5497.87 (2433.07) | 5014.47 (1545.74) | 0.510 |
| Fecal calprotectin | 32.00 (23.0–53.8) | 40.00 (15.0–64.0) | 0.512 |
| CRP mg/mL | 0.96 (0.6–3.2) | 1.93 (0.6–7.5) | 0.502 |
| ANC x 109/L | 0.26 (0.1–0.7) | 0.42 (0.1–1.3) | 0.560 |
| Albumin* | 33.02 (3.40) | 31.7 (6.07) | 0.418 |

Abbreviations: ANC, absolute neutrophil count; CRP, C-reactive protein; IQR, interquartile range; SD, standard deviation

Supplementary Table 4. Comparison of plasma AA, fecal CLP, CRP, and ANC levels in patients not manifesting with intestinal damage between the malnourished and normally nourished groups.

| **Biomarker, mcmol/L** | **Malnourished, median (IQR)/mean (SD)*** | **Normally nourished, median (IQR)/mean (SD)*** | **p-value** |
| --- | --- | --- | --- |
| Phosphoserine | 2.18 (1.6–3.8) | 2.62 (1.6–4.2) | 0.601 |
| **Taurine** | **38.15 (31**–**50.6)** | **48.70 (39.1**–**62.2)** | **0.014** |
| Phosphoetanolamine | 0.38 (0.0–1.5) | 0.00 (0.0–1.5) | 0.394 |
| Aspartate acid | 2.6 (0.0–14.2) | 7.94 (0.0–14.0) | 0.247 |
| Threonine | 198.5 (138.2–270.8) | 198.00 (144.0–290.0) | 0.543 |
| Serine | 132.00 (117.8–165.2) | 156.00 (124.5–180.5) | 0.065 |
| **Asparagine** | **0.00 (0.0–0.0)** | **0.00 (0.0**–**36.7)** | **0.003** |
| Glutamic acid | 167.40 (118.8– 281.6) | 156.30 (86.9–228) | 0.557 |
| Glutamine* | 478.44 (147.45) | 477.29 (152.27) | 0.968 |
| Sarcosine | 1.92 (0.0–4.4) | 1.2 (0.0–6.5) | 0.940 |
| Α-aminoadipic acid | 2.77 (1.5–4.3) | 3.20 (2.0–4.4) | 0.253 |
| **Glycine** | **244.50 (203.0**–**302.2)** | **278.00 (233.5**–**324.5)** | **0.044** |
| Alanine | 390.00 (251.5–558.5) | 474.00 (344.0–602.0) | 0.161 |
| Citrulline | 19.30 (10.9–24.3) | 21.70 (15.7–28.6) | 0.114 |
| Α-aminobutyric acid | 39.55 (25.1–48.7) | 35.00 (23.7–48.4) | 0.500 |
| Valine | 346.50 (256.5–490.8) | 338.00 (265.0–429.0) | 0.779 |
| Cystine | 23.40 (13.1–31.6) | 16.60 (6.7–35) | 0.352 |
| Methionine | 30.25 (21.1–38.5) | 28.60 (23.2–41.2) | 0.493 |
| Cysthathione | 1.44 (0.0–3.4) | 1.17 (0.0–3.3) | 0.951 |
| Isoleucine | 102.35 (73.1–141.1) | 94.60 (78.8–135.1) | 0.729 |
| Leucine | 194.85 (141.9–272.8) | 173.00 (140.6–247.4) | 0.529 |
| Tyrosine | 80.45 (61.2–94.3) | 75.80 (59.7–100.2) | 0.920 |
| Β-alanine | 2.80 (0.0–8.2) | 3.61 (0.0–7.2) | 0.959 |
| Phenylalanine | 120.30 (100.6–186.5) | 111.00 (79.4–168.2) | 0.105 |
| Β-aminoisobutyric acid | 0.00 (0.0–0.4) | 0.00 (0.0–1.6) | 0.846 |
| Homocysteine | 0.00 (0.0–0.0) | 0.00 (0.0–0.0) | NA |
| Ethanolamine | 0.00 (0.0–0.0) | 0.00 (0.0–0.0) | NA |
| Ammonia | 114.45 (96.8–186.4) | 104.50 (81.0–153.1) | 0.235 |
| Hydroxylysine | 0.50 (0.0–1.5) | 0.55 (0.0–1.5) | 0.971 |
| Ornithine | 52.40 (38.5–73.9) | 55.70 (44.5–75.7) | 0.364 |
| Lysine | 177.60 (129.2–216) | 186.90 (152.4–220.8) | 0.411 |
| 1-methyl-histidine | 9.55 (5.8–15.3) | 9.40 (5.5–18.6) | 0.708 |
| Histidine | 67.45 (58.4–80.6) | 74.50 (64.2–84.7) | 0.073 |
| Tryptophan | 45.00 (38.6–56) | 46.40 (35.9–55.0) | 0.677 |
| 3-methyl-histidine | 0.00 (0.0–0.0) | 0.00 (0.0–0.9) | 0.633 |
| **Arginine** | **60.10 (44.0**–**84.8)** | **73.90 (58.0**–**96.3)** | **0.024** |
| Hydroxyproline | 10.00 (8.3–27.4) | 12.10 (8.1–18.7) | 0.659 |
| Proline | 201.50 (138.2–301.2) | 228.00 (158.0–327.5) | 0.199 |
| Urea | 6014.50 (5065.0–7678.2) | 5810.00 (4274.0–7201.5) | 0.187 |
| **Fecal calprotectin** | **53.00 (25.0–93.0)** | **22.00 (8.3**–**58)** | **0.006** |
| CRP mg/ml | 2.16 (0.6–8.9) | 1.00 (0.6–6.1) | 0.289 |
| **ANC x 109/L** | **0.18 (0.0**–**0.8)** | **0.46 (0.1**–**1.3)** | **0.007** |
| **Albumin** | **33.33 (30.0**– **35.6)** | **35.00 (32.0**–**39.9)** | **0.008** |

Abbreviations: ANC, absolute neutrophil count; CRP, C-reactive protein; IQR, interquartile range; SD, standard deviation

Supplemental Table 5. Biomarker and age correlation (n = 45)

| **Biomarker** | **Correlation** | **p-value** |
| --- | --- | --- |
| Phosphoserine | 0.180 | 0.026 |
| Urea | 0.359 | <0.001 |
| Glutamic acid | -0.164 | 0.042 |
| Glutamine | 0.221 | 0.006 |
| Alanine | 0.193 | 0.017 |
| Α – aminobutyric acid | 0.266 | <0.001 |
| Valine | 0.181 | 0.025 |
| Methionine | 0.270 | <0.001 |
| Isoleucine | 0.221 | 0.006 |
| Tyrosine | 0.311 | <0.001 |
| Lysine | 0.267 | 0.001 |
| 1-methyl-histidine | 0.253 | 0.002 |
| Tryptophan | 0.300 | <0.001 |
| 3-methyl-histidine | 0.197 | 0.014 |
| Hydroxyproline | 0.185 | 0.022 |
| Proline | 0.262 | 0.001 |
